# Supplementary material for: DnaJ, A Promising Vaccine Candidate Against Ureaplasma Urealyticum Infection
Source: Research Square preprint supplement (doi:10.21203/rs.3.rs-1132437/v1), 2021-12-06
Supplement: Supplementary file 1 [file 5b758fa18b7cd21abfd7d15f.docx]

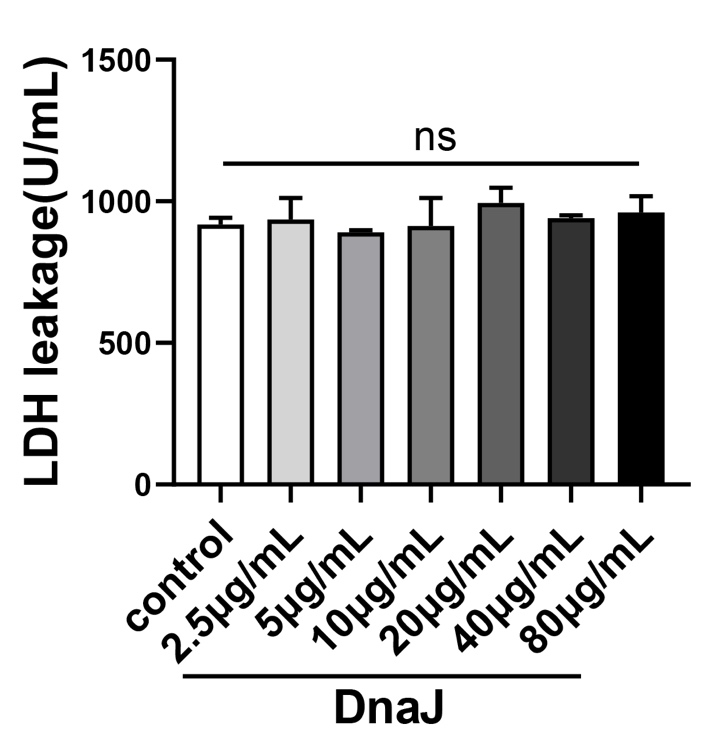


Figure S2. The noncytotoxic dose of DnaJ on BMDCs was detected. BMDCs were treated with DnaJ at a concentration from 2.5 μg/mL to 80 μg/mL with for 48 h, and the LDH activity in the supernatant was measured with a kit, ns = not significant, P > 0.05.
