# Supplementary material for: DnaJ, A Promising Vaccine Candidate Against Ureaplasma Urealyticum Infection
Source: Research Square preprint supplement (doi:10.21203/rs.3.rs-1132437/v1), 2021-12-06
Supplement: Supplementary file 2 [file 76675401db89baae1a34bf52.docx]

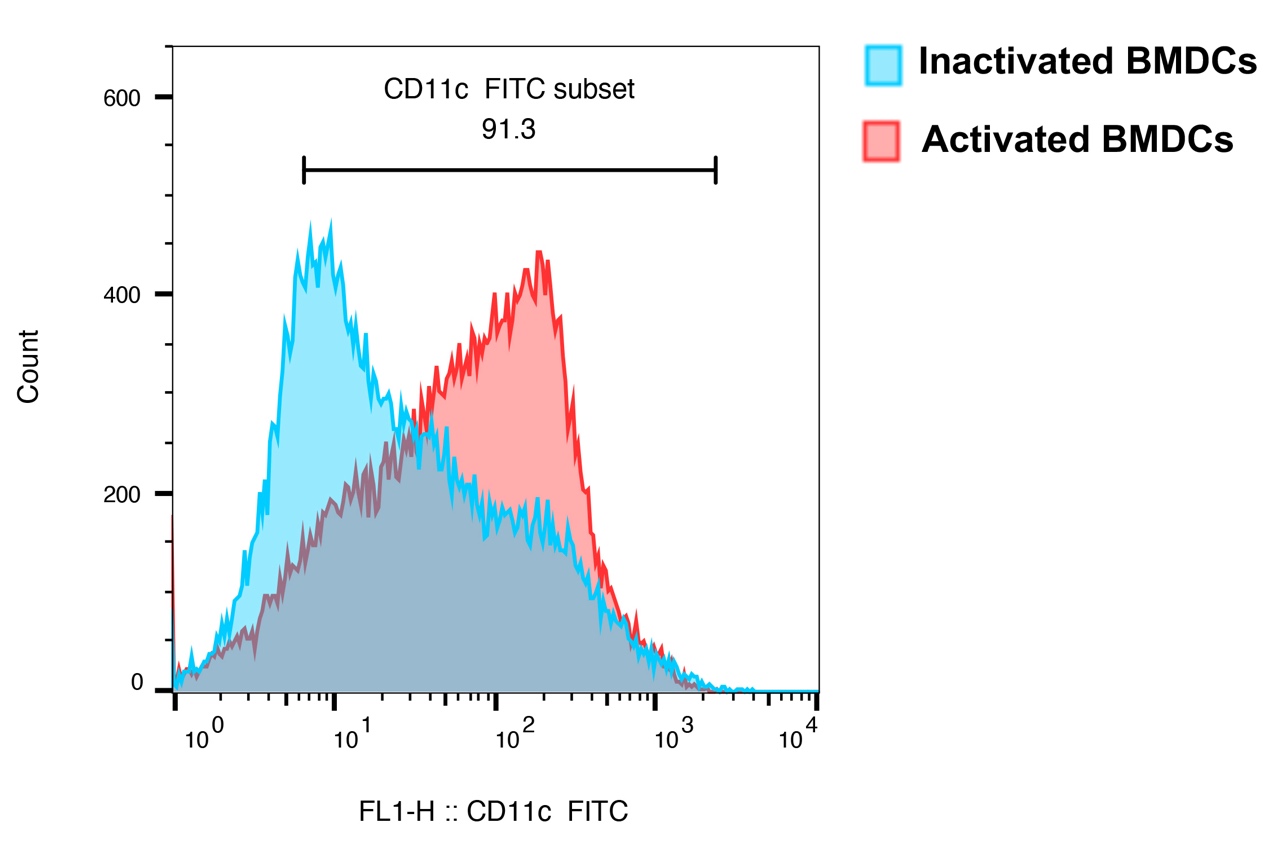


Figure S1. The specific marker of BMDCs. Generation of BMDCs from the bone marrow precursors after 6 d culture with 10 ng/ml GM-CSF and 10 ng/ml IL-4. CD11c+ cells were detected by FACS. More than 90% of the suspension cells expressed CD11c.
